# Supplementary material
Source: publisher figshare collection journal article supplement (https://gsajournals.figshare.com/ndownloader/files/24459287)
Supplement: Supplementary file 1 [file 24459287]

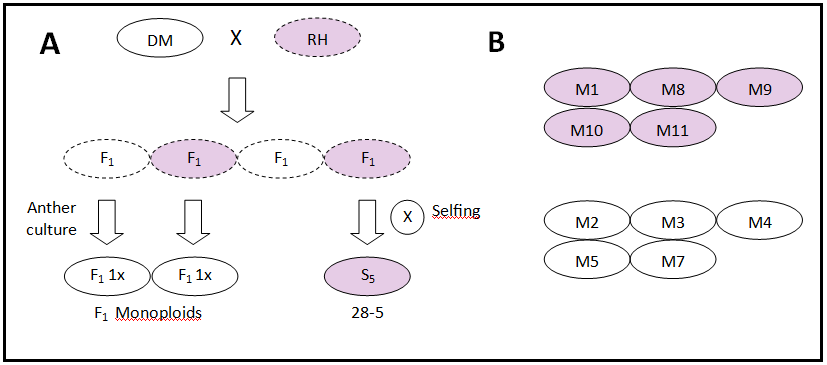


Supplementary Figure 1: Overview of the germplasm utilized in this study. Each oval's color corresponds to genotype flower color, solid outlines indicate (near) homozygosity while dashed indicate heterozygous background. A) DRH population and its derivatives (DM, RH the F1 and the S5 are all diploid (2*n*=2*x*-24) whereas the F1 monoploids and the monoploids from the panel have 2*n*=1*x*=12). B) The monoploid panel published in Hardigan et al. (2016).
